# Supplementary material for: Mitigation of Particulate Matter and Airborne Pathogens in Swine Barn Emissions with Filtration and UV-A Photocatalysis
Source: Preprints.org preprint supplement (doi:10.20944/preprints202110.0162.v1), 2021-10-11
Supplement: Supplementary file 1 [file supplementary]

# Mitigation of particulate matter and airborne pathogens in swine barn emissions with filtration and UV-A photocatalysis

Myeongseong Lee <sup>1</sup>, Jacek A. Koziel <sup>1\*</sup>, N bia Macedo <sup>2</sup>, Peiyang Li <sup>1</sup>, Baitong Chen <sup>1</sup>, William S. Jenks <sup>3</sup>, Jeffrey Zimmerman <sup>2</sup>, R. Vincent Paris <sup>4</sup>

<sup>1</sup> Department of Agricultural and Biosystems Engineering, Iowa State University, Ames, IA 50011, USA; leefame@iastate.edu (M.L.), koziel@iastate.edu (J.K.), peiyangl@iastate.edu (P.L.), baitongc@iastate.edu (B.C.)

<sup>2</sup> Veterinary Diagnostic and Production Animal Medicine, Iowa State University, Ames, IA 50011, USA; nubia@iastate.edu (N.M.), jjzimm@iastate.edu (J.Z.)

<sup>3</sup> Department of Chemistry, Iowa State University, Ames, IA 50011, USA; wsjenks@iastate.edu (W.J.)

<sup>4</sup> Department of Statistics, Iowa State University, Ames, IA 50011, USA; vinny@iastate.edu (V.P.)

\* Correspondence: koziel@iastate.edu; Tel.: +1-515-294-4206

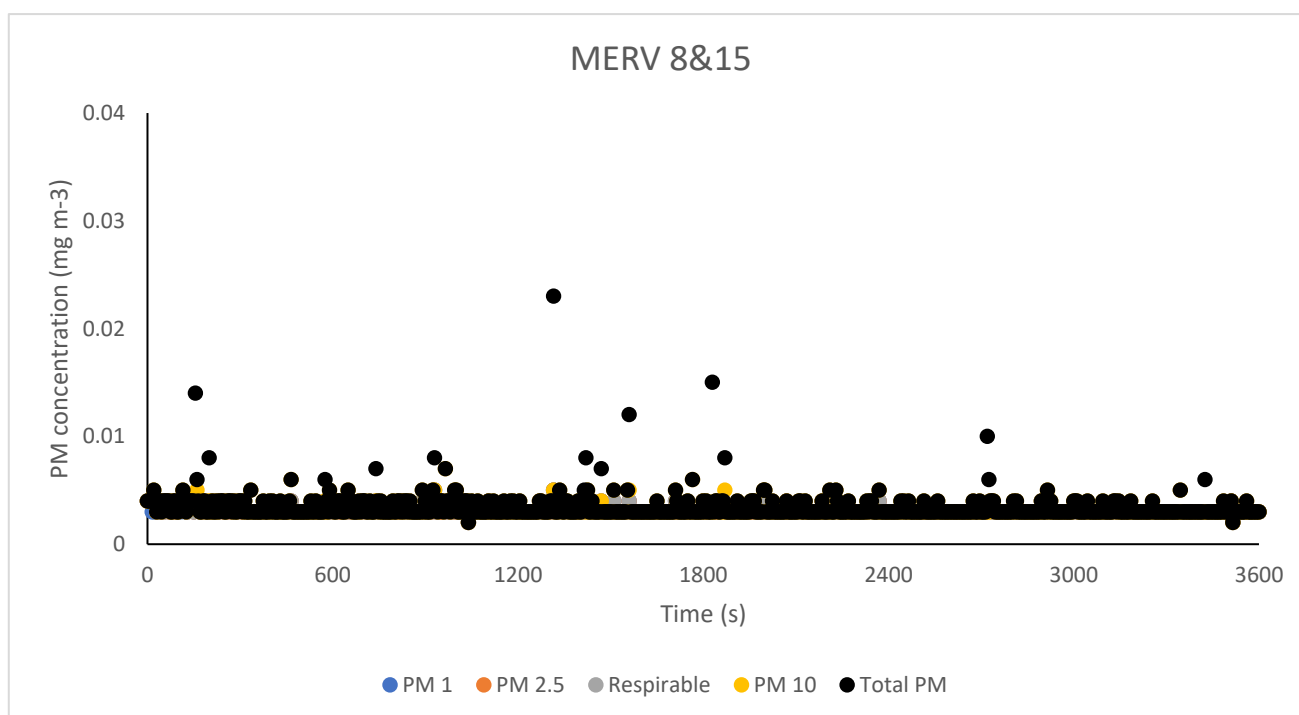

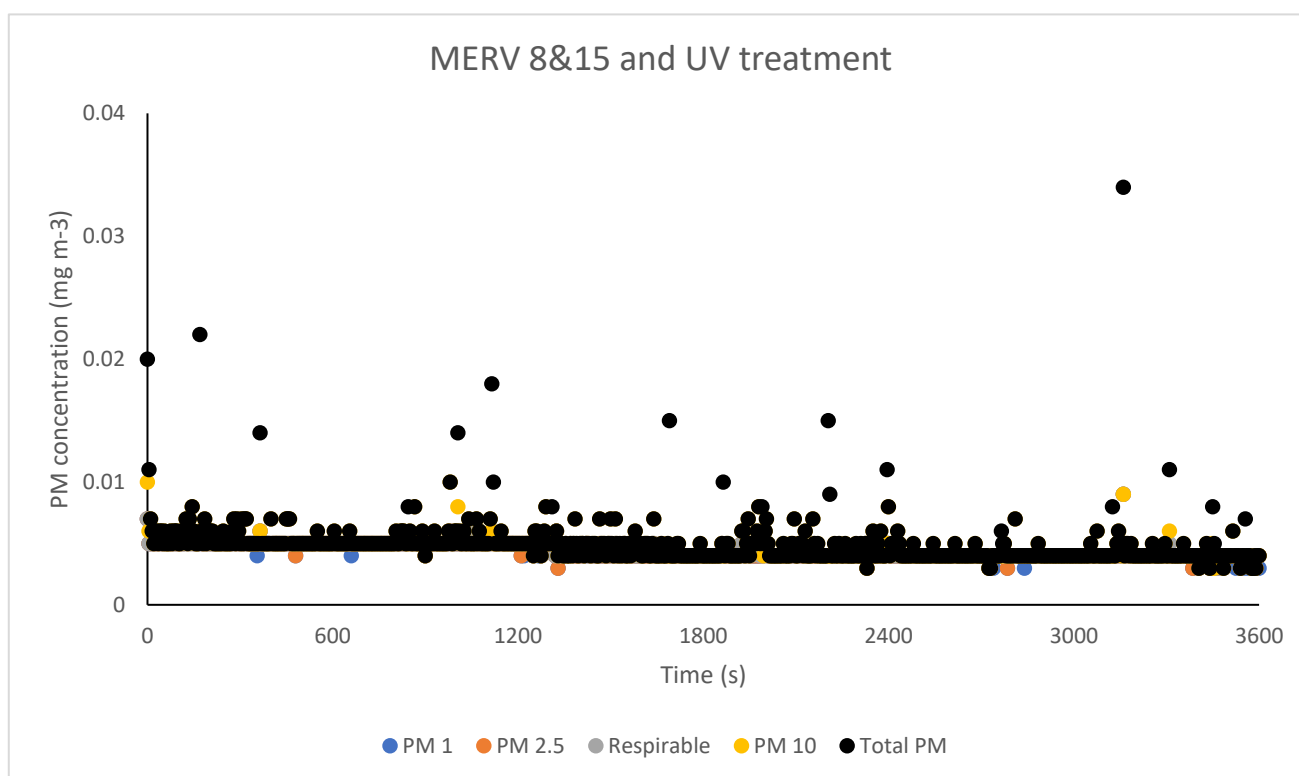

**Supplementary Figure S1.** Real-time measured PM concentration during 1 h air sampling (the 'best-case' scenario, MERV 8 & 15 filtration and UV-A treatment).

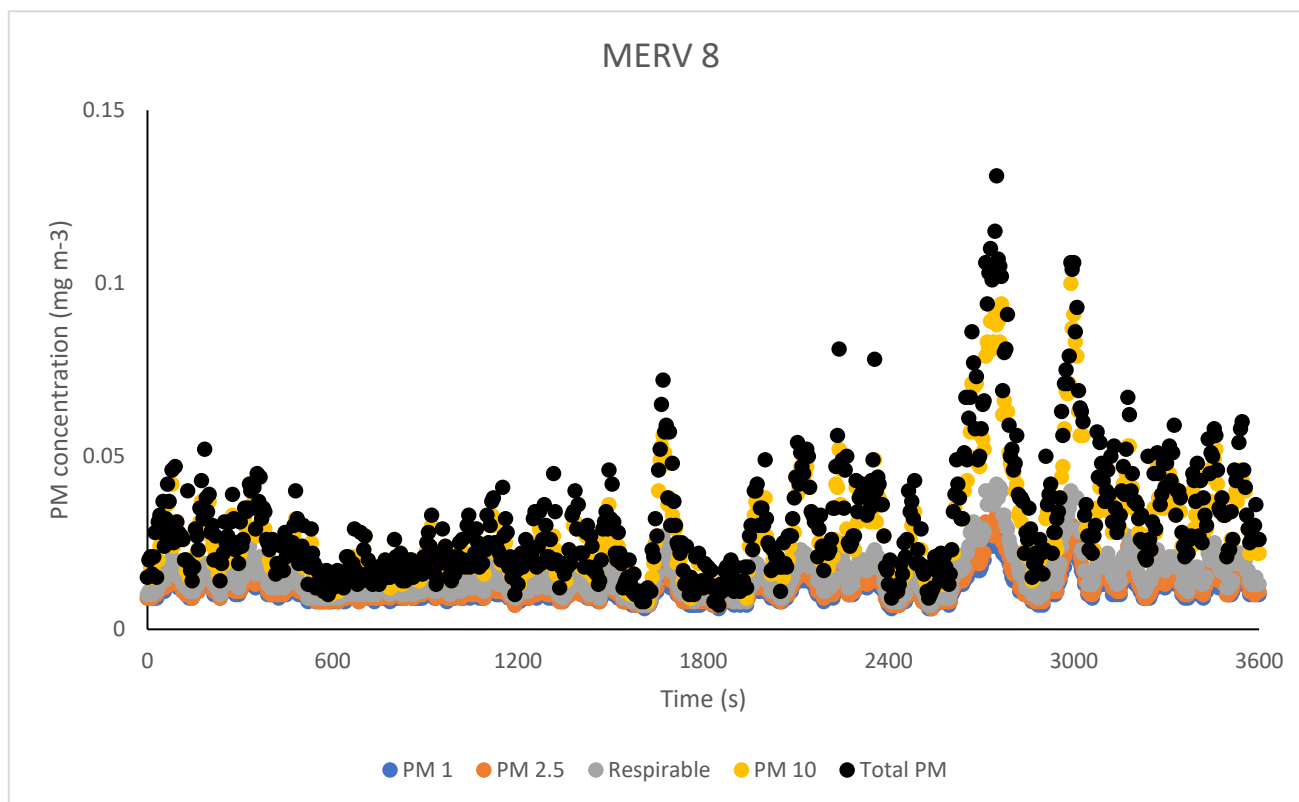

16

17

18

19

20

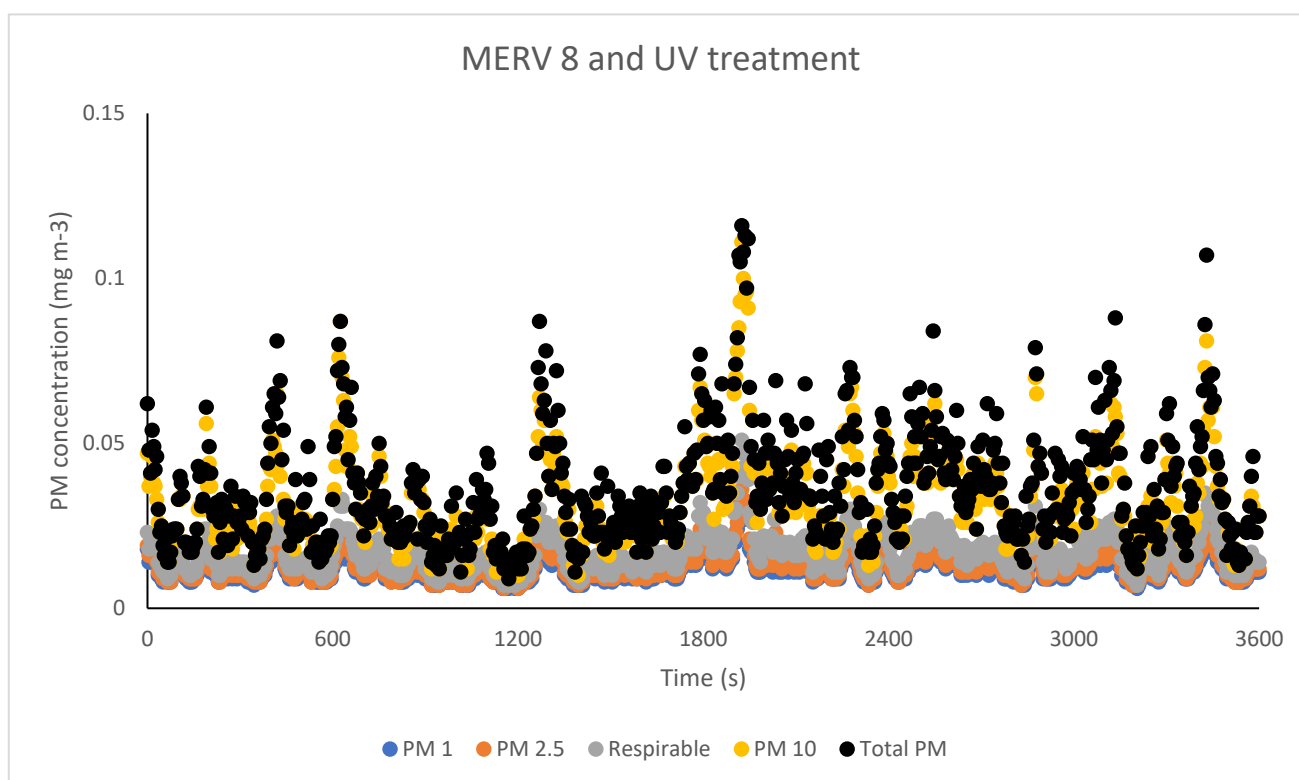

**Supplementary Figure S2.** Real-time measured PM concentration during 1 h air sampling (the 'midpoint' scenario, MERV 8 only, and UV-A treatment).

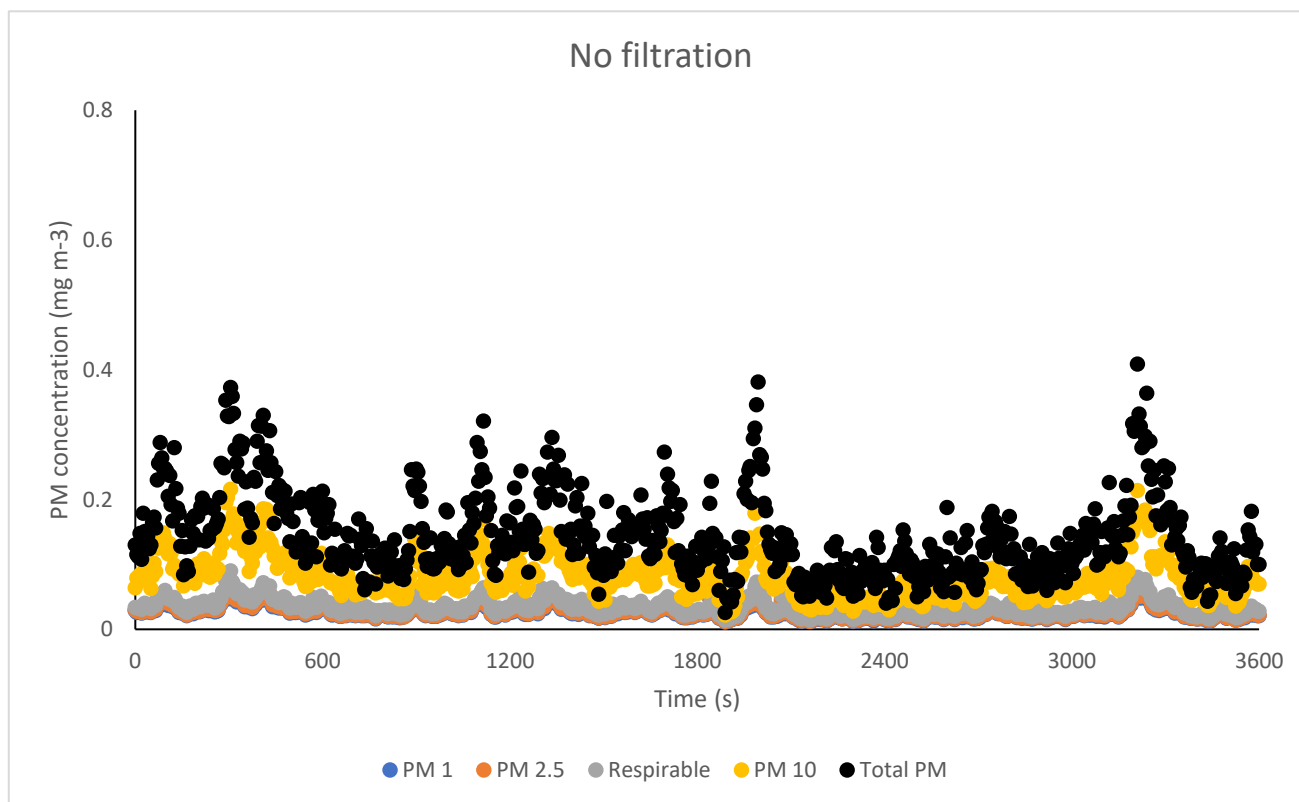

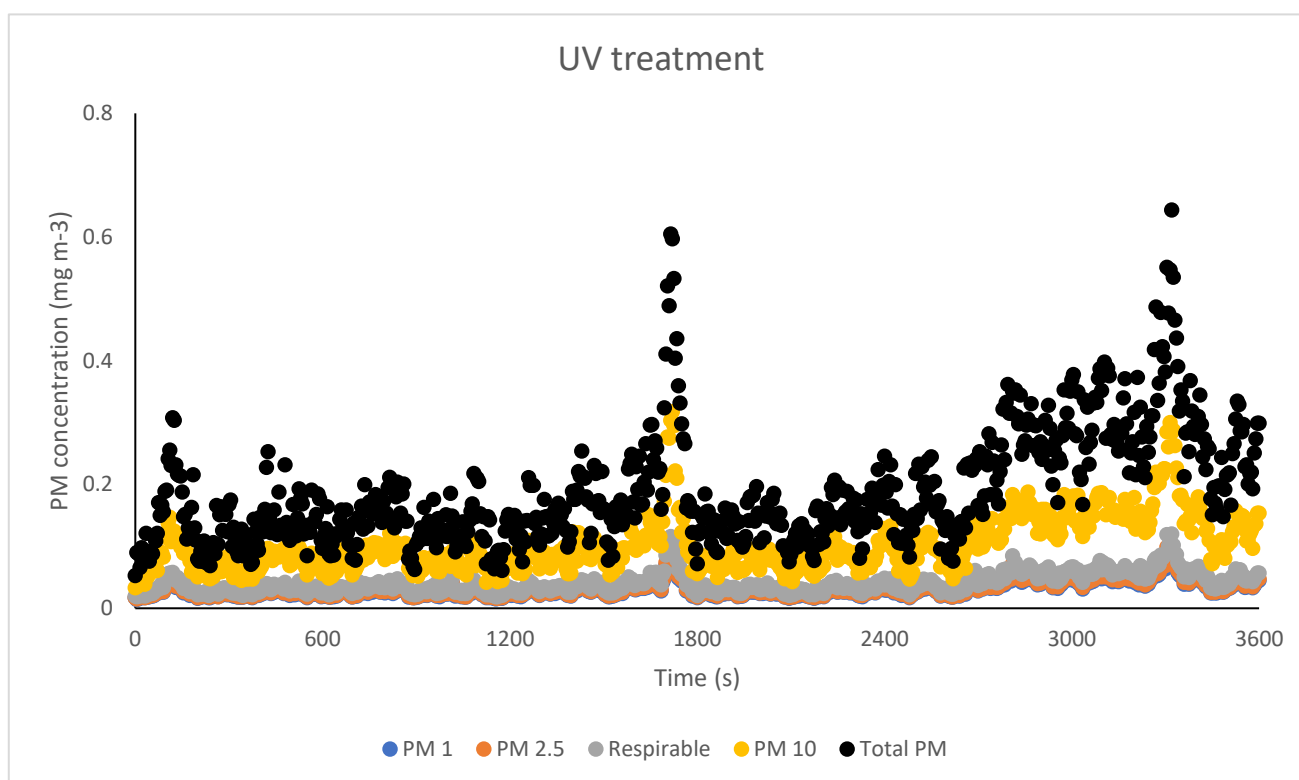

**Supplementary Figure S3.** Real-time measured PM concentration during 1 h air sampling (the 'worst-case' scenario, no filtration and UV-A treatment).

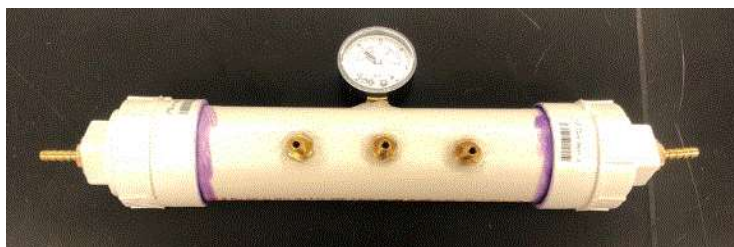

**Supplementary Figure S4.** Manifold with a pressure gauge to facilitate the simultaneous collection of three samples of airborne pathogens.

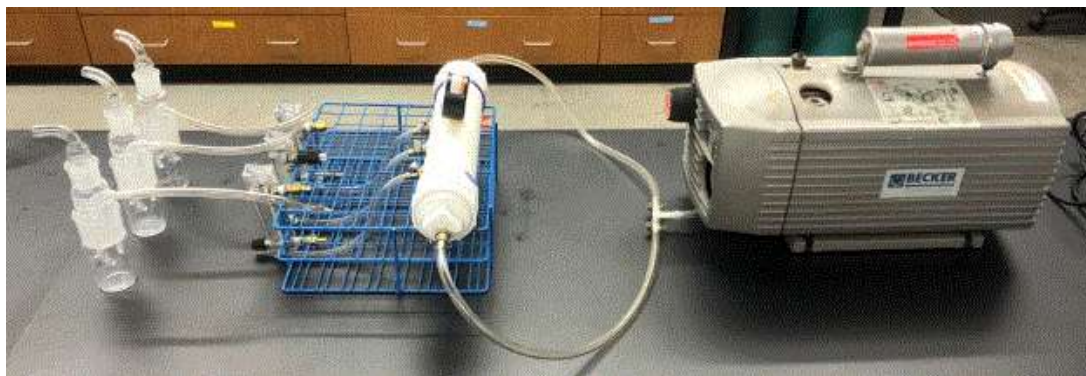

**Supplementary Figure S5.** Pathogen sampling system with three impingers, airflow meters, manifold with pressure gauge, and vacuum pump.

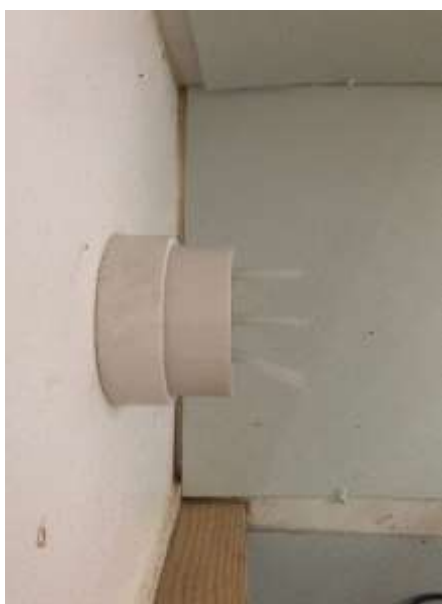

**Supplementary Figure S6.** Sampling tube inlets on the UV-A treatment side of sampling ports inside the mobile lab.

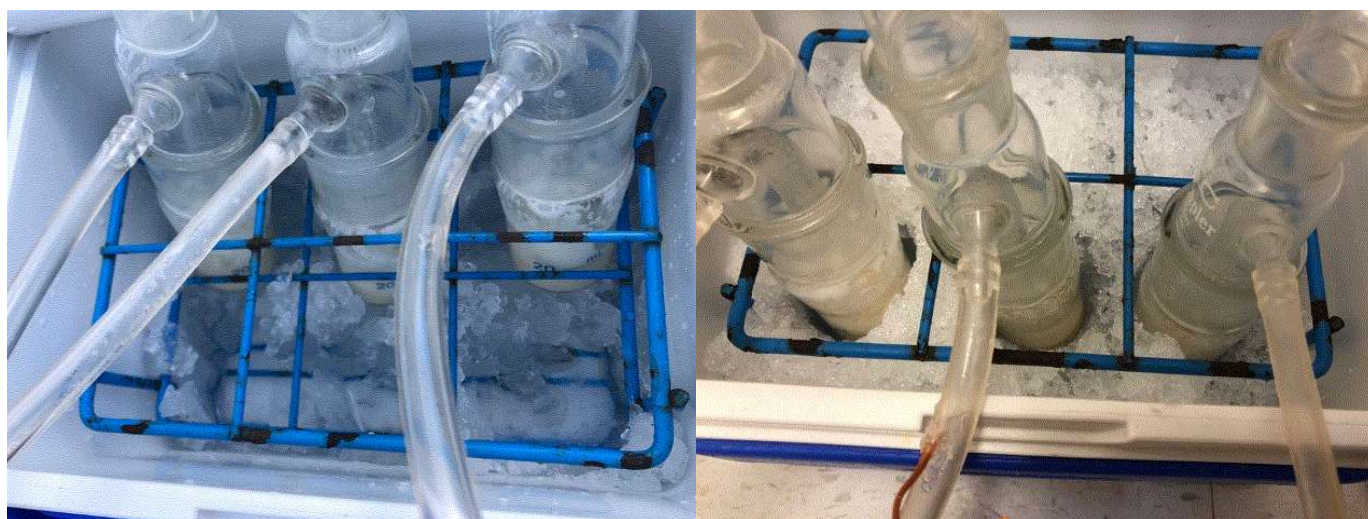

**Supplementary Figure S7.** Effects of the antifoaming agent addition into impinger solution. Foam formation during sampling (Left); No foam formed when Antifoam A added (Right). Impingers were held in an ice bath during air sampling.

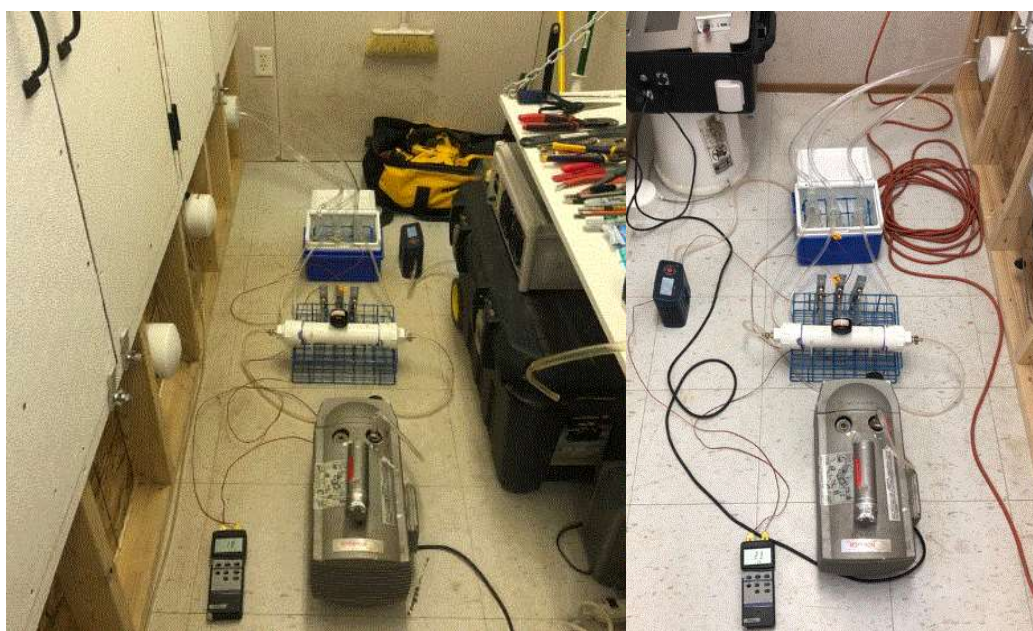

**Supplementary Figure S8.** Airborne pathogen sampling system. (Left) Air inlet to the UV mobile lab (downstream from the MERV filtration unit); (Right) air outlet after UV treatment.

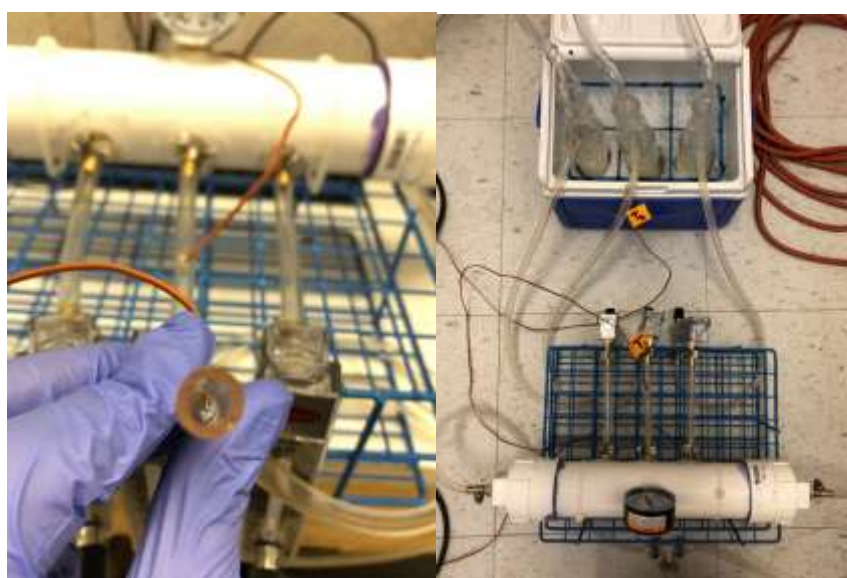

**Supplementary Figure S9.** Air sample temperature monitoring. (Left) thermocouple tip and seal; (Right) thermocouples installed immediately downstream from the impinger and after airflow monitor (rotameter).

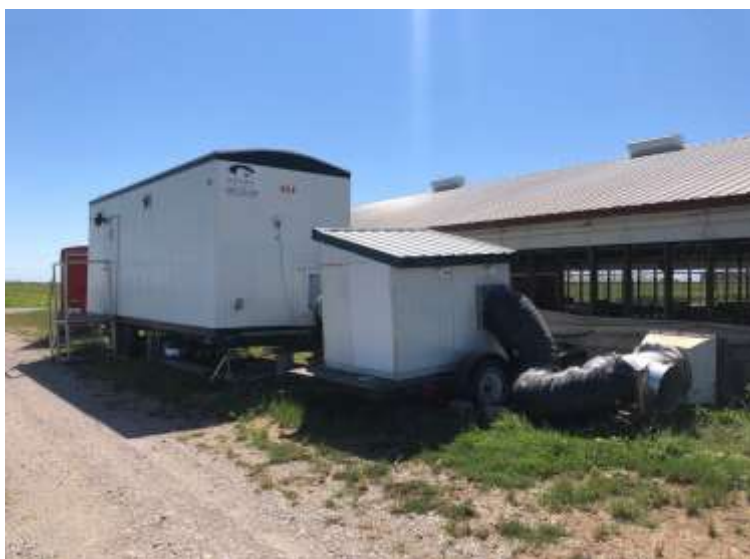

**Supplementary Figure S10.** Mobile laboratory for UV and filtration treatment deployed for testing mitigation of gaseous emissions at a swine farm.

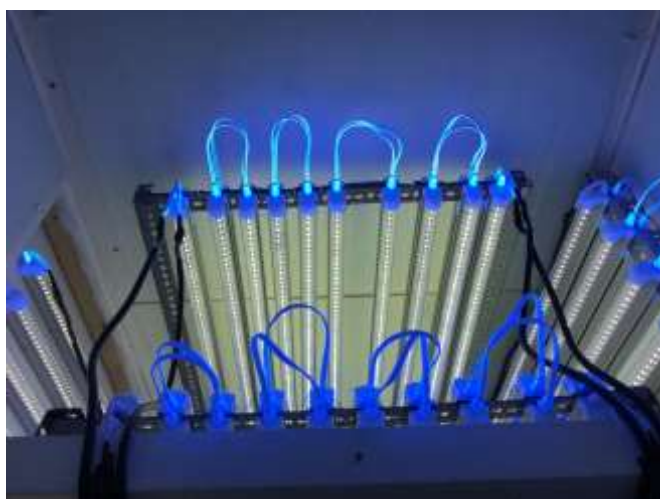

**Supplementary Figure S11.** Arrangement of 55 UV-A LED lamps installed in one of the chambers inside the mobile laboratory to treat emissions from the swine barn.

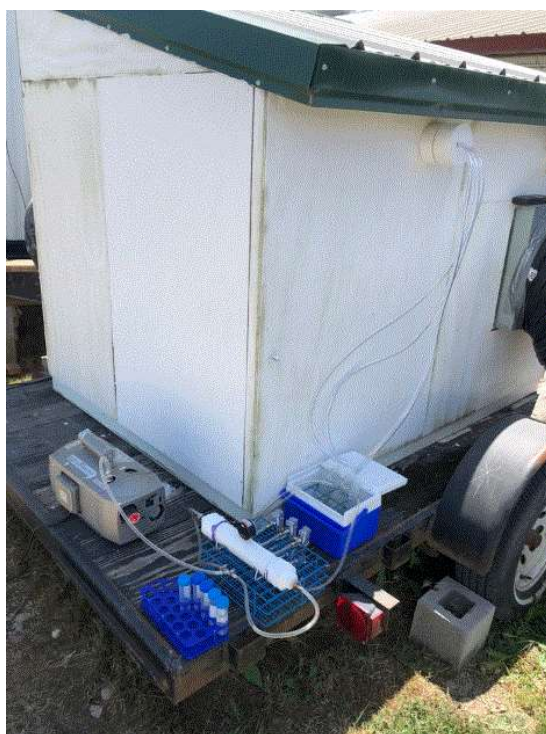

**Supplementary Figure S12.** Pathogen sampling system before the MERV filtration unit samples raw exhaust from swine barn fan.

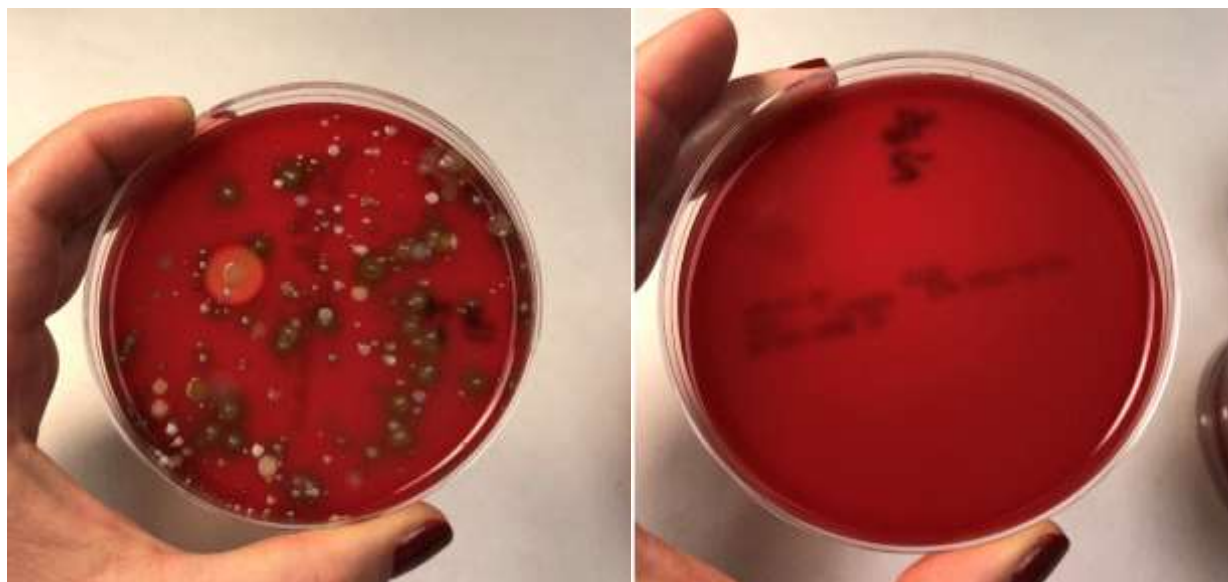

**Supplementary Figure S13.** Colony-forming in the culture medium after sampling for 60 min. (Left: before MERV filtration, Right: after MERV 8 and 15 filtration).

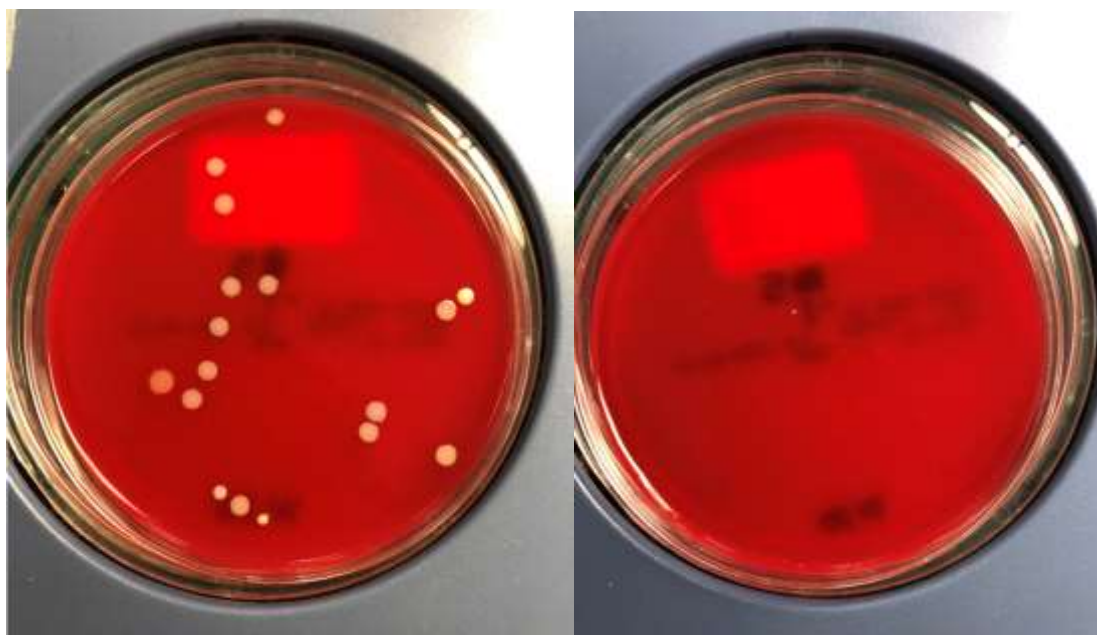

**Supplementary Figure S14.** Colony-forming in the culture medium after sampling for 60 min. (Left: after MERV 8 filtration, Right: after UV treatment).

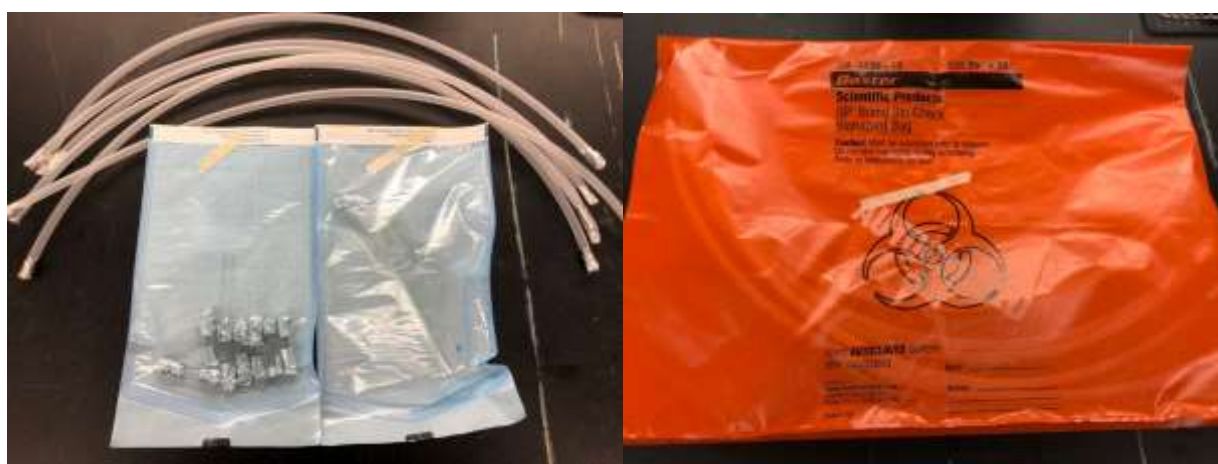

**Supplementary Figure S15.** Sterilization of impingers, air sampling tubing, and the impinger-tube connectors prepared for autoclaving.

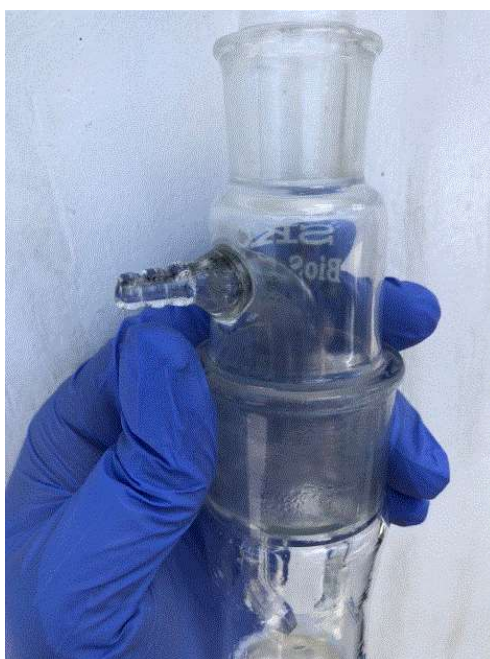

**Supplementary Figure S16.** Dust accumulated inside the inlet port to impinger after sample collection of raw swine barn exhaust and before MERV filtration unit. Dust is the potential carrier of airborne pathogens.

**Supplementary Table S1.** Summary of average PM concentration.

80

| Sampling date<br>(2020) |         | Control            |                    |                                 |                    |                    | Treatment          |                    |                                 |                    |                    |
|-------------------------|---------|--------------------|--------------------|---------------------------------|--------------------|--------------------|--------------------|--------------------|---------------------------------|--------------------|--------------------|
|                         |         | Total PM           | PM 10              | Respirable<br>(PM 4 -<br>PM 10) | PM 2.5             | PM 1               | Total PM           | PM 10              | Respirable<br>(PM 4 -<br>PM 10) | PM 2.5             | PM 1               |
| MERV 8&15               | Aug. 13 | 0.00339<br>±0.0014 | 0.0033<br>±0.0008  | 0.00311<br>±0.0004              | 0.00309<br>±0.0003 | 0.00301<br>±0.0003 | 0.00479<br>±0.0022 | 0.0047<br>±0.0007  | 0.0045<br>±0.0006               | 0.0046<br>±0.0006  | 0.00431<br>±0.0006 |
|                         | Sep. 8  | 0.00342<br>±0.0012 | 0.0033<br>±0.0006  | 0.00314<br>±0.0004              | 0.00309<br>±0.0003 | 0.00307<br>±0.0003 | 0.00493<br>±0.0019 | 0.00471<br>±0.0009 | 0.00446<br>±0.0006              | 0.0044<br>±0.0006  | 0.00438<br>±0.0006 |
| MERV 8                  | Sep. 9  | 0.0306<br>±0.0182  | 0.02695<br>±0.0147 | 0.01502<br>±0.0059              | 0.01236<br>±0.0043 | 0.01154<br>±0.0038 | 0.03596<br>±0.0173 | 0.03138<br>±0.0144 | 0.01651<br>±0.0060              | 0.01303<br>±0.0042 | 0.01197<br>±0.037  |
| No filtration           | Sep. 10 | 0.1442<br>±0.0592  | 0.0843<br>±0.0411  | 0.03612<br>±0.0318              | 0.02711<br>±0.0091 | 0.02584<br>±0.0247 | 0.191<br>±0.0708   | 0.1012<br>±0.05354 | 0.0404<br>±0.0224               | 0.03488<br>±0.0116 | 0.03119<br>±0.0209 |
|                         | Sep. 17 | 0.14227<br>±0.0647 | 0.08022<br>±0.0328 | 0.03359<br>±0.0120              | 0.02832<br>±0.0100 | 0.02688<br>±0.0095 | 0.18724<br>±0.0908 | 0.10061<br>±0.0444 | 0.0403<br>±0.0161               | 0.03383<br>±0.0134 | 0.03209<br>±0.0127 |

81

82

**Supplementary Table S2.** Mitigation of the airborne bacteria under the UV-A photocatalysis with MERV 8 & 15 filtration.

|                                                                                                             | Inlet air with filtered out<br>particle matter |                         |      | Outlet air after<br>UV-A treatment |      |                         |
|-------------------------------------------------------------------------------------------------------------|------------------------------------------------|-------------------------|------|------------------------------------|------|-------------------------|
| Total CFU·mL <sup>-1</sup><br>(as measured in the impinger media of 20 mL)                                  | 1.2<br>×10 <sup>2</sup>                        | 3.0<br>×10 <sup>1</sup> | 0    | 0                                  | 0    | 1.0<br>×10 <sup>1</sup> |
| Total CFU                                                                                                   | 2.4<br>×10 <sup>3</sup>                        | 6.0<br>×10 <sup>2</sup> | 0    | 0                                  | 0    | 2.0<br>×10 <sup>2</sup> |
| Sampling time (min)                                                                                         | 60                                             |                         |      |                                    |      |                         |
| Air temperature (°C)                                                                                        | 13.2                                           |                         |      | 17.3                               |      |                         |
| RH (in front of impinger, %)                                                                                | 68.6                                           |                         |      | 64.1                               |      |                         |
| Pressure (inside the manifold, psi)                                                                         | 450                                            |                         |      | 450                                |      |                         |
| Airflow rate by rotameter (L·min <sup>-1</sup> )                                                            | 20                                             | 20                      | 20   | 20                                 | 20   | 20                      |
| Sampling rate of air by each impinger<br>( <i>Q<sub>st</sub></i> , L·min <sup>-1</sup> , NTP <sup>a</sup> ) | 12.1                                           | 12.1                    | 12.1 | 12.0                               | 12.0 | 12.0                    |
| Total volume of air sampled (m <sup>3</sup> , NTP <sup>a</sup> )                                            | 0.73                                           | 0.73                    | 0.73 | 0.72                               | 0.72 | 0.72                    |
| Total CFU·m <sup>-3</sup> in air ( <i>CFU<sub>D</sub></i> , NTP <sup>a</sup> )                              | 3,300                                          | 825                     | 0    | 0                                  | 0    | 279                     |
| Average total PM concentration during bioaerosol<br>sampling (mg·m <sup>-3</sup> )                          | 0.0034                                         |                         |      | 0.0049                             |      |                         |
| Total CFU <sub>D</sub> /average total PM ( <i>CFU<sub>PM</sub></i> , CFU·μg <sup>-1</sup> )                 | 964                                            | 241                     | 0.0  | 0.0                                | 0.0  | 56.6                    |
| Average total CFU <sub>D</sub> /average PM in exhaust air (CFU·μg <sup>-1</sup> , n=3, mean ± st.dev.)      | 402 ± 502                                      |                         |      | 18.9 ± 32.6                        |      |                         |
| % reduction of CFU <sub>PM</sub> (% <i>R</i> )                                                              | 95.3                                           |                         |      |                                    |      |                         |
| <i>p</i> -Value                                                                                             | 0.33                                           |                         |      |                                    |      |                         |

Note: <sup>a</sup> Normal temperature and pressure is defined as air at 20 °C and 1 atm.

**Supplementary Table S3.** Mitigation of the airborne bacteria under the UV-A photocatalysis with MERV 8 filtration. **Bold** font signifies statistical significance.

|                                                                                                        | Inlet air with filtered out<br>particle matter |                         |                         | Outlet air after UV-A<br>treatment |                         |                         |
|--------------------------------------------------------------------------------------------------------|------------------------------------------------|-------------------------|-------------------------|------------------------------------|-------------------------|-------------------------|
| Total CFU·mL <sup>-1</sup><br>(as measured in the impinger media of 20 mL)                             | 3.4<br>×10 <sup>2</sup>                        | 3.6<br>×10 <sup>2</sup> | 4.9<br>×10 <sup>2</sup> | 2.5<br>×10 <sup>2</sup>            | 2.5<br>×10 <sup>2</sup> | 2.9<br>×10 <sup>2</sup> |
| Total CFU                                                                                              | 6.8<br>×10 <sup>3</sup>                        | 7.2<br>×10 <sup>3</sup> | 9.8<br>×10 <sup>3</sup> | 5.0<br>×10 <sup>3</sup>            | 5.0<br>×10 <sup>3</sup> | 5.8<br>×10 <sup>3</sup> |
| Sampling time (min)                                                                                    | 60                                             |                         |                         |                                    |                         |                         |
| Air temperature (°C)                                                                                   | 9.8                                            |                         |                         | 13.4                               |                         |                         |
| RH (in front of impinger, %)                                                                           | 93.8                                           |                         |                         | 80.2                               |                         |                         |
| Pressure (inside the manifold, psi)                                                                    | 450                                            |                         |                         | 450                                |                         |                         |
| Airflow rate by rotameter (L·min <sup>-1</sup> )                                                       | 20                                             | 20                      | 20                      | 20                                 | 20                      | 20                      |
| Sampling rate of air by each impinger<br>( $Q_{st}$ , L·min <sup>-1</sup> , NTP <sup>a</sup> )         | 12.3                                           | 12.3                    | 12.3                    | 12.1                               | 12.1                    | 12.1                    |
| Total volume of air sampled (m <sup>3</sup> , NTP <sup>a</sup> )                                       | 0.74                                           | 0.74                    | 0.74                    | 0.73                               | 0.73                    | 0.73                    |
| Total CFU·m <sup>-3</sup> of exhaust air ( $CFU_D$ , NTP <sup>a</sup> )                                | 9,240                                          | 9,780                   | 13,300                  | 6,880                              | 6,880                   | 7,980                   |
| Average total PM of exhaust air during bioaerosol sampling<br>(mg·m <sup>-3</sup> )                    | 0.0306                                         |                         |                         | 0.0359                             |                         |                         |
| Total CFU <sub>D</sub> /average Total PM ( $CFU_{PM}$ , CFU·μg <sup>-1</sup> )                         | 302                                            | 320                     | 435                     | 192                                | 192                     | 222                     |
| Mean Total CFU <sub>D</sub> /average PM in exhaust air (CFU·μg <sup>-1</sup> , n=3,<br>mean ± st.dev.) | 352±72.3                                       |                         |                         | 202±17.7                           |                         |                         |
| % reduction of CFU <sub>PM</sub> (% <i>R</i> )                                                         | <b>42.7</b>                                    |                         |                         |                                    |                         |                         |
| <i>p</i> -Value                                                                                        | <b>0.04</b>                                    |                         |                         |                                    |                         |                         |

Note: <sup>a</sup> Normal temperature and pressure is defined as air at 20 °C and 1 atm.

**Supplementary Table S4.** Mitigation of the airborne bacteria under the UV-A photocatalysis without MERV filtration.

|                                                                                                     | Inlet air with particle matter |                          |                          | Outlet air after UV-A treatment |                          |                          |
|-----------------------------------------------------------------------------------------------------|--------------------------------|--------------------------|--------------------------|---------------------------------|--------------------------|--------------------------|
| Total CFU·mL <sup>-1</sup><br>(as measured in the impinger media of 20 mL)                          | 3.2<br>×10 <sup>3</sup>        | 1.38<br>×10 <sup>3</sup> | 8.4<br>×10 <sup>2</sup>  | 1.16<br>×10 <sup>3</sup>        | 1.26<br>×10 <sup>3</sup> | 7.8<br>×10 <sup>2</sup>  |
| Total CFU                                                                                           | 6.4<br>×10 <sup>4</sup>        | 2.76<br>×10 <sup>4</sup> | 1.68<br>×10 <sup>4</sup> | 2.32<br>×10 <sup>4</sup>        | 2.52<br>×10 <sup>4</sup> | 1.56<br>×10 <sup>4</sup> |
| Sampling time (min)                                                                                 | 60                             |                          |                          |                                 |                          |                          |
| Air temperature (°C)                                                                                | 15.2                           |                          |                          | 18.9                            |                          |                          |
| RH (in front of impinger, %)                                                                        | 51.6                           |                          |                          | 45.8                            |                          |                          |
| Pressure (inside the manifold, psi)                                                                 | 450                            |                          |                          | 450                             |                          |                          |
| Airflow rate by rotameter (L·min <sup>-1</sup> )                                                    | 20                             | 20                       | 20                       | 20                              | 20                       | 20                       |
| Sampling rate of air by each impinger ( $Q_{st}$ , L·min <sup>-1</sup> , NTP <sup>a</sup> )         | 12.0                           | 12.0                     | 12.0                     | 11.9                            | 11.9                     | 11.9                     |
| Total volume of air sampled (m <sup>3</sup> , NTP <sup>a</sup> )                                    | 0.72                           | 0.72                     | 0.72                     | 0.71                            | 0.71                     | 0.71                     |
| Total CFU·m <sup>-3</sup> of exhaust air ( $CFU_D$ , NTP <sup>a</sup> )                             | 88,600                         | 38,210                   | 23,260                   | 32,530                          | 35,330                   | 21,870                   |
| Average total PM of exhaust air during bioaerosol sampling (mg·m <sup>-3</sup> )                    | 0.142                          |                          |                          | 0.187                           |                          |                          |
| Total CFU <sub>D</sub> /average Total PM ( $CFU_{PM}$ , CFU·μg <sup>-1</sup> )                      | 623                            | 269                      | 163                      | 174                             | 189                      | 117                      |
| Mean Total CFU <sub>D</sub> /average PM in exhaust air (CFU·μg <sup>-1</sup> , n=3, mean ± st.dev.) | 352±241                        |                          |                          | 160±38                          |                          |                          |
| % reduction of CFU <sub>PM</sub> (% R)                                                              | 54.6                           |                          |                          |                                 |                          |                          |
| <i>p</i> -Value                                                                                     | 0.28                           |                          |                          |                                 |                          |                          |

Note: <sup>a</sup> Normal temperature and pressure is defined as air at 20 °C and 1 atm.
