# Supplementary material for: Mitigation of Particulate Matter and Airborne Pathogens in Swine Barn Emissions with Filtration and UV-A Photocatalysis
Source: Preprints.org preprint supplement (doi:10.20944/preprints202110.0162.v1), 2021-10-11
Supplement: Supplementary file 2 [file supplementary]

Archive with 1 entries (1 files):
- Supplementary Material 08Oct2021.pdf
